# Supplementary material for: Cloning, Expression, and Tobacco Overexpression Analyses of a PISTILLATA/GLOBOSA-like (OfGLO1) Gene from Osmanthus fragrans
Source: MDPI journal article supplement (doi:10.3390/genes12111748), 2021-10-30
Supplement: s1 [file s1]

## Supplementary Materials

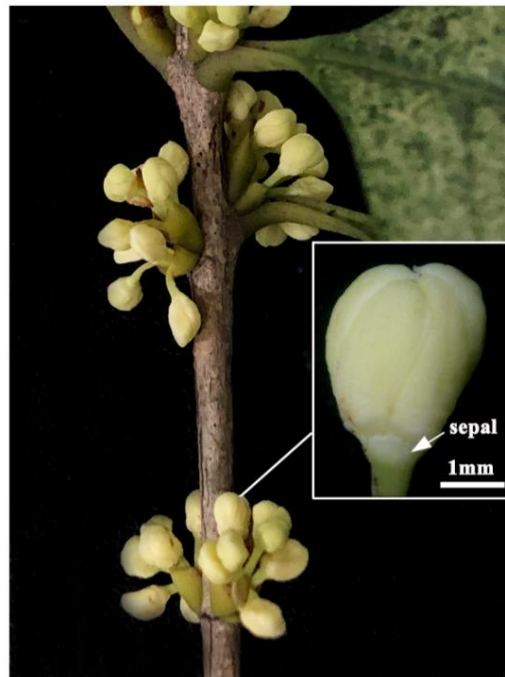

**Figure S1.** The flowers of *O. fragrans* in the early flowering stage. White arrow showed the sepal structure. Bar, 1mm.

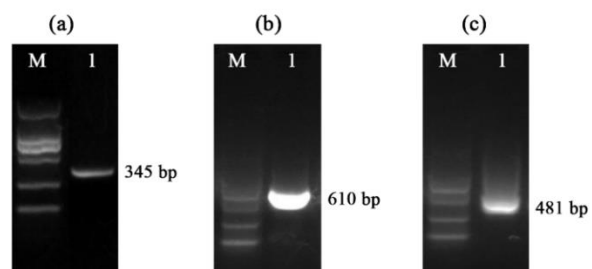

**Figure S2.** Agarose gel electrophoresis of DNA fragments. The cloning results of the middle fragment (a), 3' RACE (b), 5' RACE (c) of *OfGLO1* gene. M: DM 2000 DNA marker; 1: Target fragment.

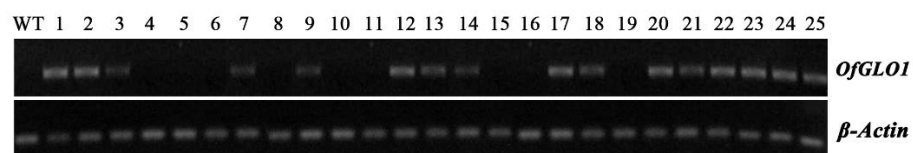

**Figure S3.** RT-PCR detection of tobaccos transformed with the *OfGLO1* gene. WT: wild-type.

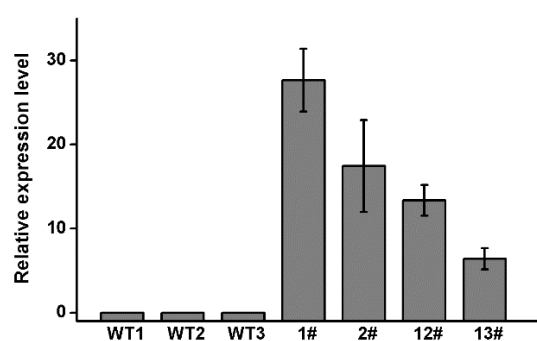

**Figure S4.** The expression level of *OfGLO1* in transgenic tobacco leaves was detected using quantitative real-time RT-PCR. Cytokine gene (*β-Actin*) was used as the internal reference gene. WT: wild-type.

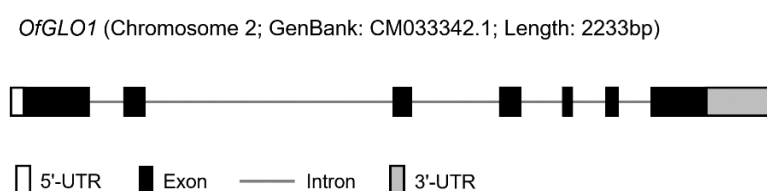

**Figure S5.** The gene structure analysis of *OfGLO1*. Gray line, intron; black box, exon.

**Table S1.** Primers used for cloning, vector construction and expression analysis of *OfGLO1* in *O. fragrans*

| Primer purpose                                    | Primer name      | Primer sequence (5' - 3')           |
|---------------------------------------------------|------------------|-------------------------------------|
| The middle fragment cloning                       | GLO1-F           | GCATGAGCATTGGACAA                   |
|                                                   | GLO1-R           | GGCATTGGTATTCGTAGTC                 |
| Detecting positive colony                         | M13-F            | GTAAAACGACGGCCAGT                   |
|                                                   | M13-R            | CAGGAAACAGCTATGAC                   |
| 3' RACE                                           | GLO1-3'-1        | GGAAGAAGCTCTGGGATGCTAA              |
|                                                   | GLO1-3'-2        | GTCTGAGTGGAGAGGACATAACAA            |
|                                                   | Outer Primer     | GCGAGCACAGAATTAATACGACT             |
|                                                   | Inner Primer     | CGCGGATCCGAATTAATACGACTCACTATAGG    |
| 5' RACE                                           | GLO1-5'-1        | CCTCATCATCGGCACACACT                |
|                                                   | GLO1-5'-2        | GAGTTCAGTCTGCATCCTGTCATT            |
|                                                   | Outer Primer     | GCTGATGGCGATGAATGAACACTG            |
|                                                   | Inner Primer     | CGCGGATCCGAACACTGCGTTTGCTGGCTTTGATG |
| cDNA cloning and expression<br>vetor construction | GLO1-Kpn I       | GGGGTACCATGGGGAGAGGGAAGAT           |
|                                                   | GLO1-Xba I       | GCTCTAGACTAGAAACGATCCTGTAAATTAG     |
| Expression level analysis                         | qGLO1-F          | CAGTACCATAAACTCTCTGGGAAG            |
|                                                   | qGLO1-R          | GTTGTTATGTCCTCTCCACTCAG             |
|                                                   | qActin-F         | ATTATTTCTTGCTCATAACGGTCAG           |
|                                                   | qActin-R         | ATTAGTCCTCTTCCAGCCTTCTTTG           |
|                                                   | $\beta$ -Actin-F | GATCTTGCTGGTCGTGATCT                |
|                                                   | $\beta$ -Actin-R | ACTTCCGGACATCTGAACCT                |

Note: ORF, open reading frame.

**Table S2. Conserved elements in the promoter of *OfGLO1*, *BpMADS2* and *AtGLO1*.**

| Species                       | Homolog genes<br>of <i>PI/GLO</i> | Putative motifs                   | Nucleotide<br>sequence | Location<br>(relative to ATG)                      |
|-------------------------------|-----------------------------------|-----------------------------------|------------------------|----------------------------------------------------|
| <i>Osmanthus<br/>fragrans</i> | <i>OfGLO1</i> (KY575409)          | putative CArG-box                 | CCTATTTCTGG            | -2775 to -2765                                     |
|                               |                                   |                                   | CCACTAAATGG            | -2501 to -2491                                     |
|                               |                                   |                                   | CCTCTTTTGG             | -1427 to -1418                                     |
|                               |                                   |                                   | CCTACAATGG             | -153 to -144                                       |
|                               |                                   | <i>PI</i> late expression element | TCAAGAAA               | -2834 to -2827;<br>-2165 to -2158;<br>-650 to -643 |
| <i>Betula pendula</i><br>Roth | <i>BpMADS2</i> (AJ968321)         | putative CArG-box                 | CCTTGTTTAGG            | -2993 to -2283                                     |
|                               |                                   |                                   | CCATAAAAGG             | -2207 to -2198                                     |
|                               |                                   |                                   | CCATGTTTGG             | -2158 to -2149                                     |
|                               |                                   |                                   | CCTTAGTTTGG            | -1722 to -1712                                     |
| <i>Arabidopsis</i>            | <i>AtGLO1</i> (AT5G20240)         | putative CArG-box                 | CCTCATTAGG             | -1856 to -1847                                     |
|                               |                                   | <i>PI</i> late expression element | TCAAGAAA               | -1197 to -1190;<br>-210 to -203                    |

Note: *PI*, *PISTILLATA*; *GLO*, *GLOBOSA*. ATG, translation initiation codon.
